# Supplementary material
Source: PubMed Central journal article supplement (PMC3513345)
Supplement: NIHMS414467-supplement-01.pdf [file NIHMS414467-supplement-01.pdf]

## SUPPLEMENTARY ONLINE DATA

# Modulation of microtubule dynamics by a TIR domain protein from the intracellular pathogen *Brucella melitensis*

Girish K. RADHAKRISHNAN, Jerome S. HARMS and Gary A. SPLITTER<sup>1</sup>

Department of Pathobiological Sciences, 1656 Linden Drive, University of Wisconsin-Madison, Madison, WI 53706, U.S.A.

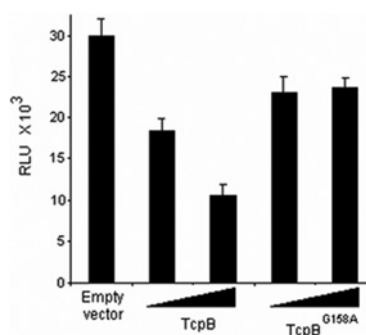

**Figure S1 An intact TIR domain is crucial for TLR suppression of TcpB**

NF- $\kappa$ B reporter assays were performed with TcpB or TcpB<sup>G158A</sup> using HEK (human embryonic kidney)-TLR2 cells. Cells were co-transfected with increasing concentrations (50 and 250 ng) of TcpB or TcpB<sup>G158A</sup>, pNF- $\kappa$ B-luc (50 ng) reporter plasmid and pRL-TK (10 ng). The total amount of DNA was made constant by adding empty vector. Luciferase activity was measured 24 h after transfection using the dual-luciferase reporter assay system. RLU, relative light units.

Received 29 March 2011/15 June 2011; accepted 20 June 2011

Published as BJ Immediate Publication 20 June 2011, doi:10.1042/BJ20110577

<sup>1</sup> To whom correspondence should be addressed (email Splitter@svm.vetmed.wisc.edu).
